# Supplementary material for: Inflammatory crosstalk impairs phagocytic receptors and aggravates atherosclerosis in clonal hematopoiesis in mice
Source: PubMed Central journal article supplement (PMC11684819; doi:10.1172/jci182939), 2024-11-12

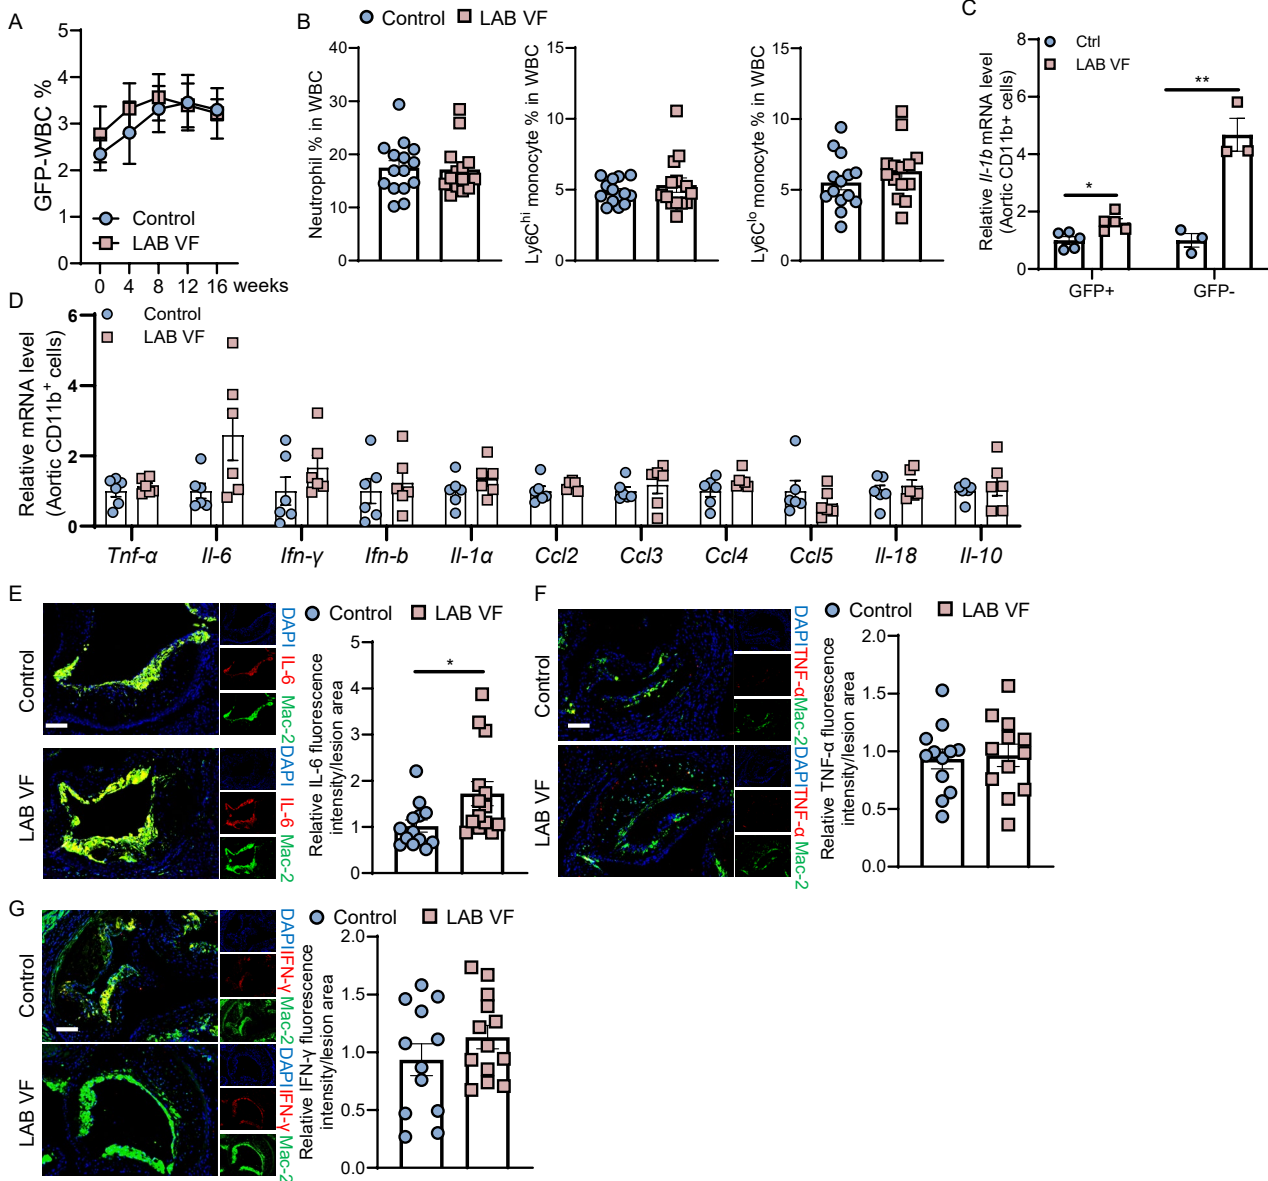

A

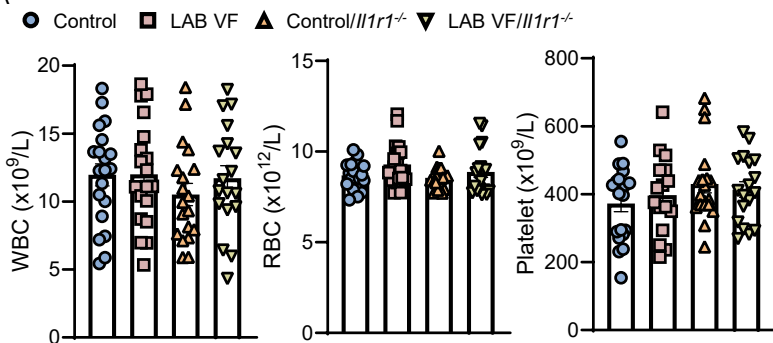

B

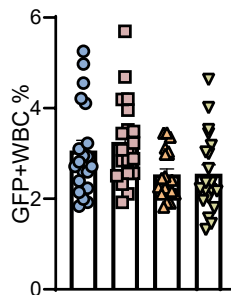

C

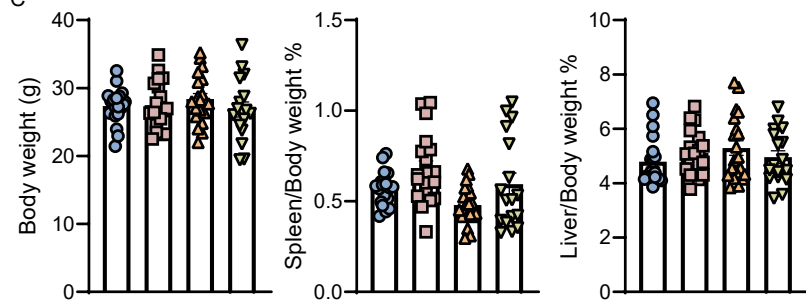

D

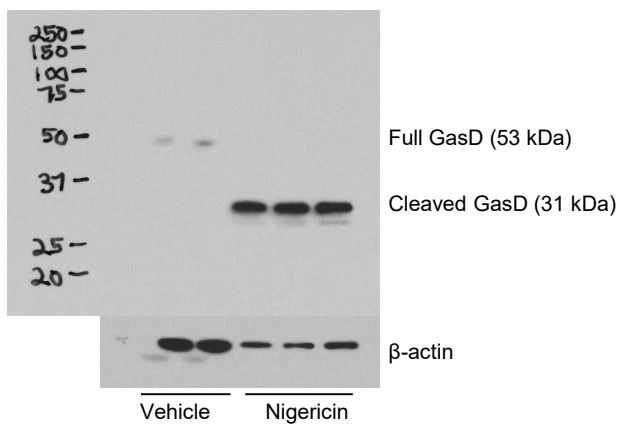

E

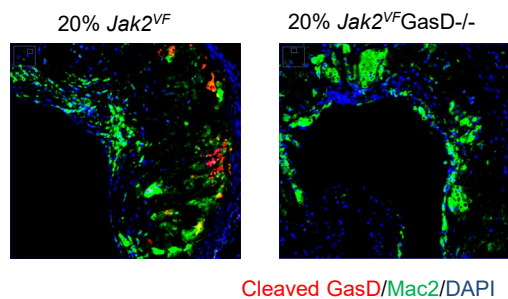

F

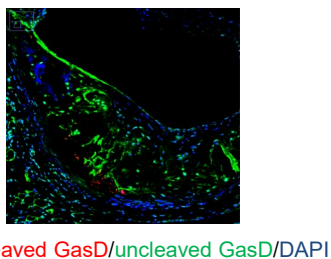

Supplemental Figure 3 (Related to Figure 4-5)

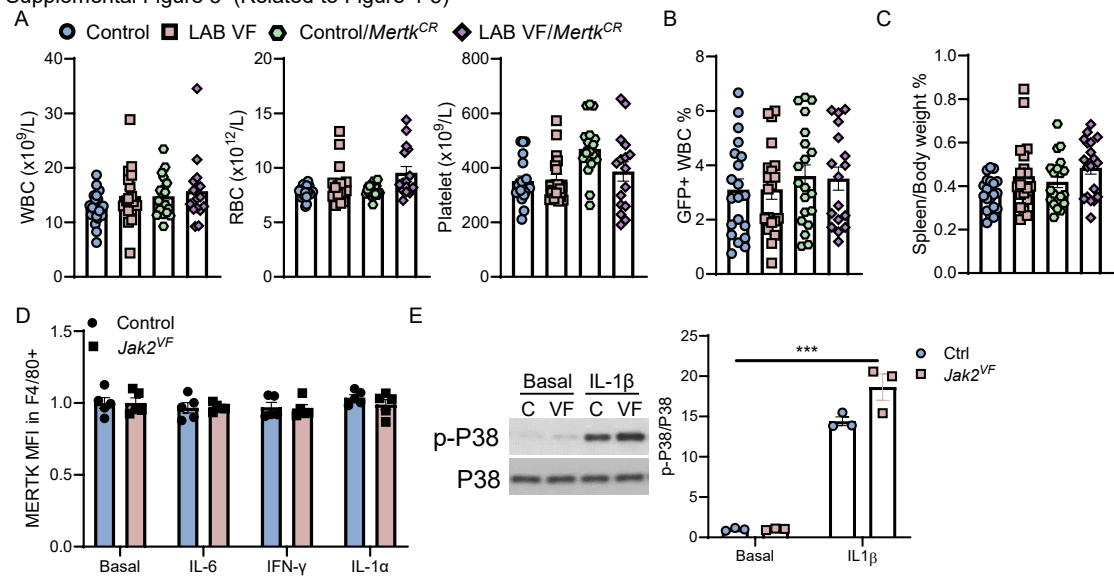

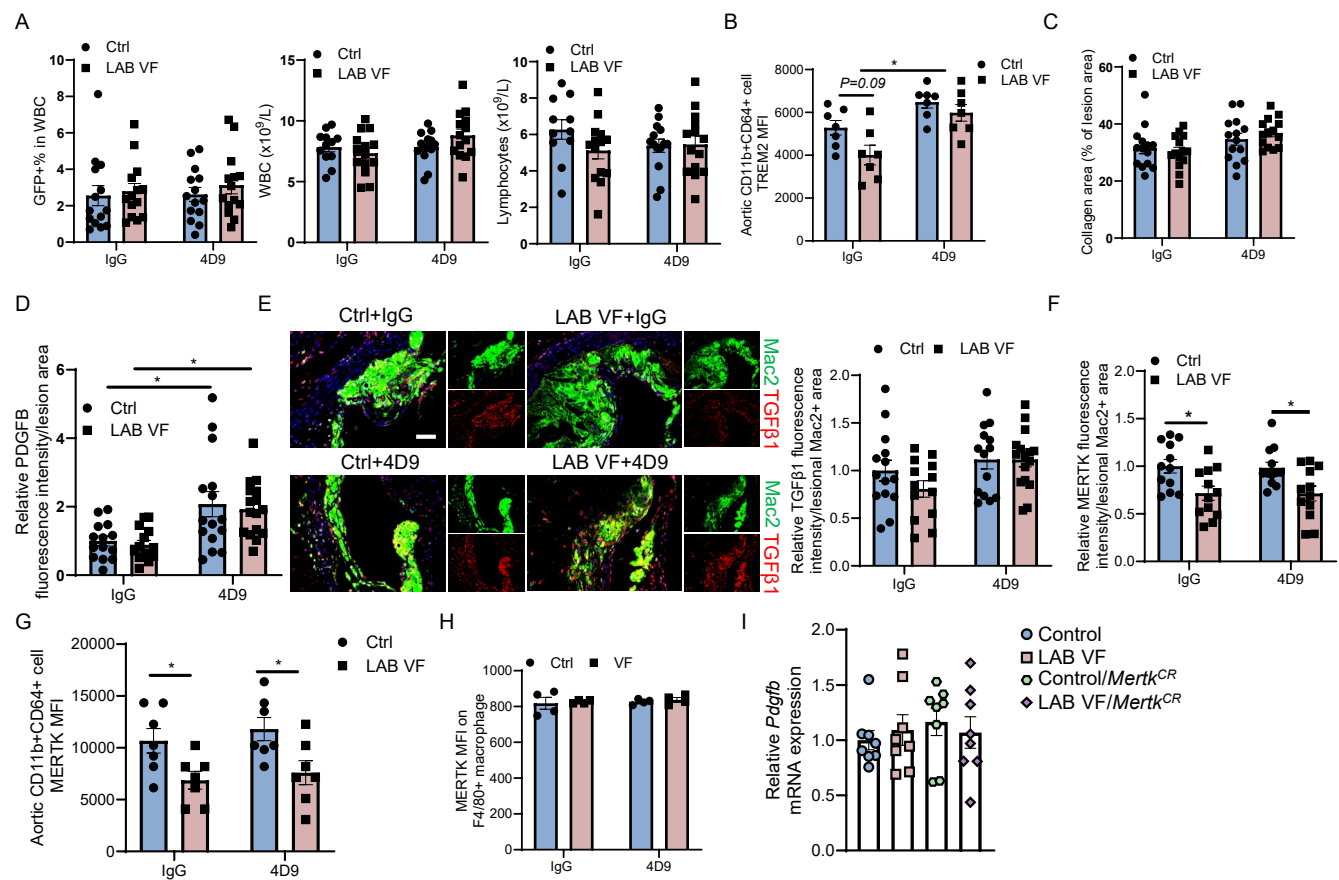

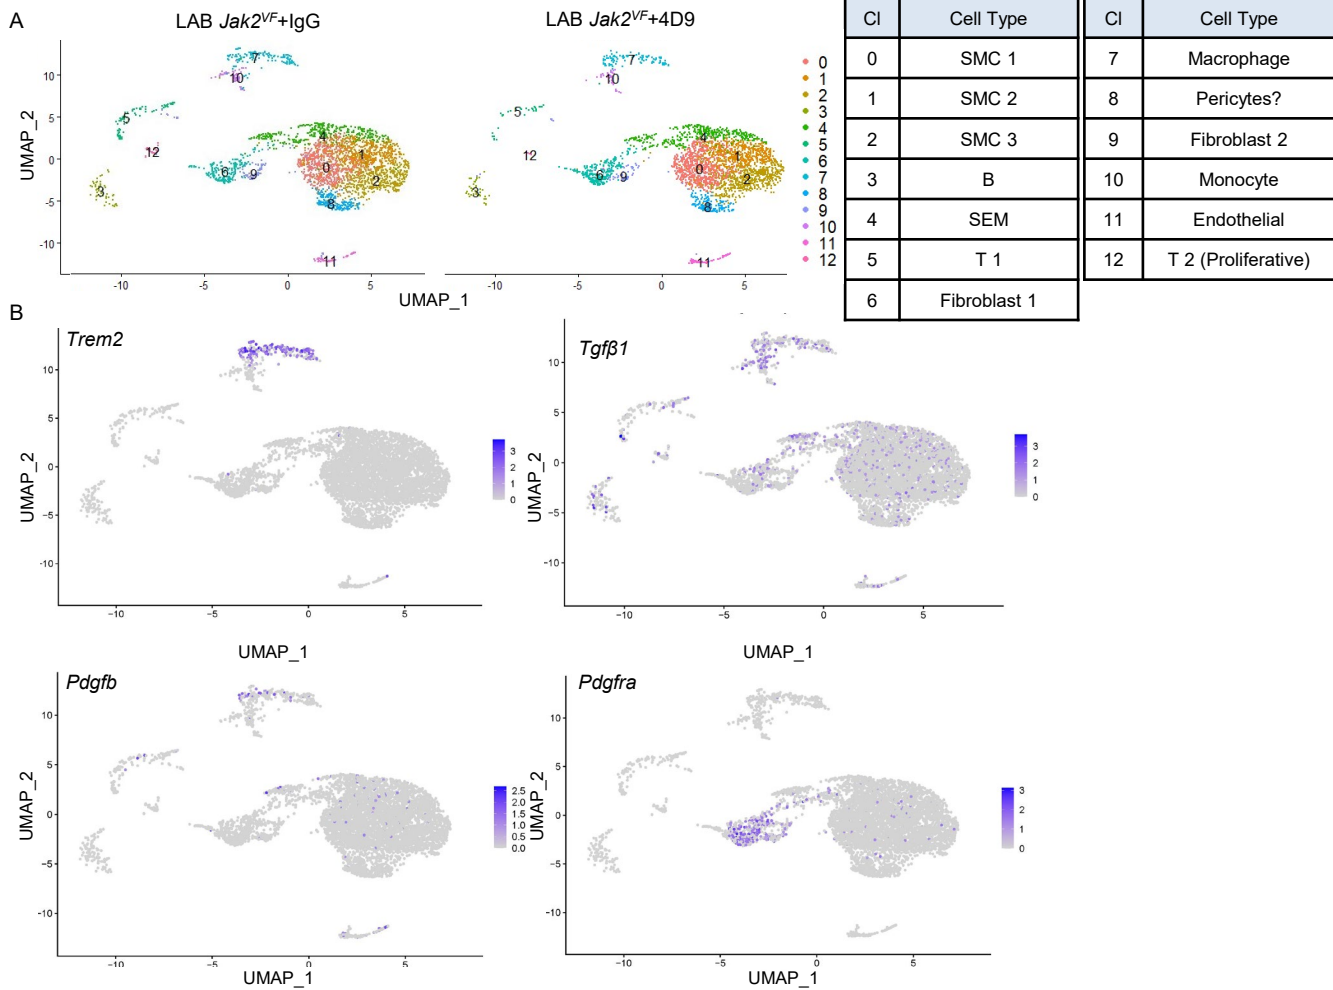

Supplemental Figure 6

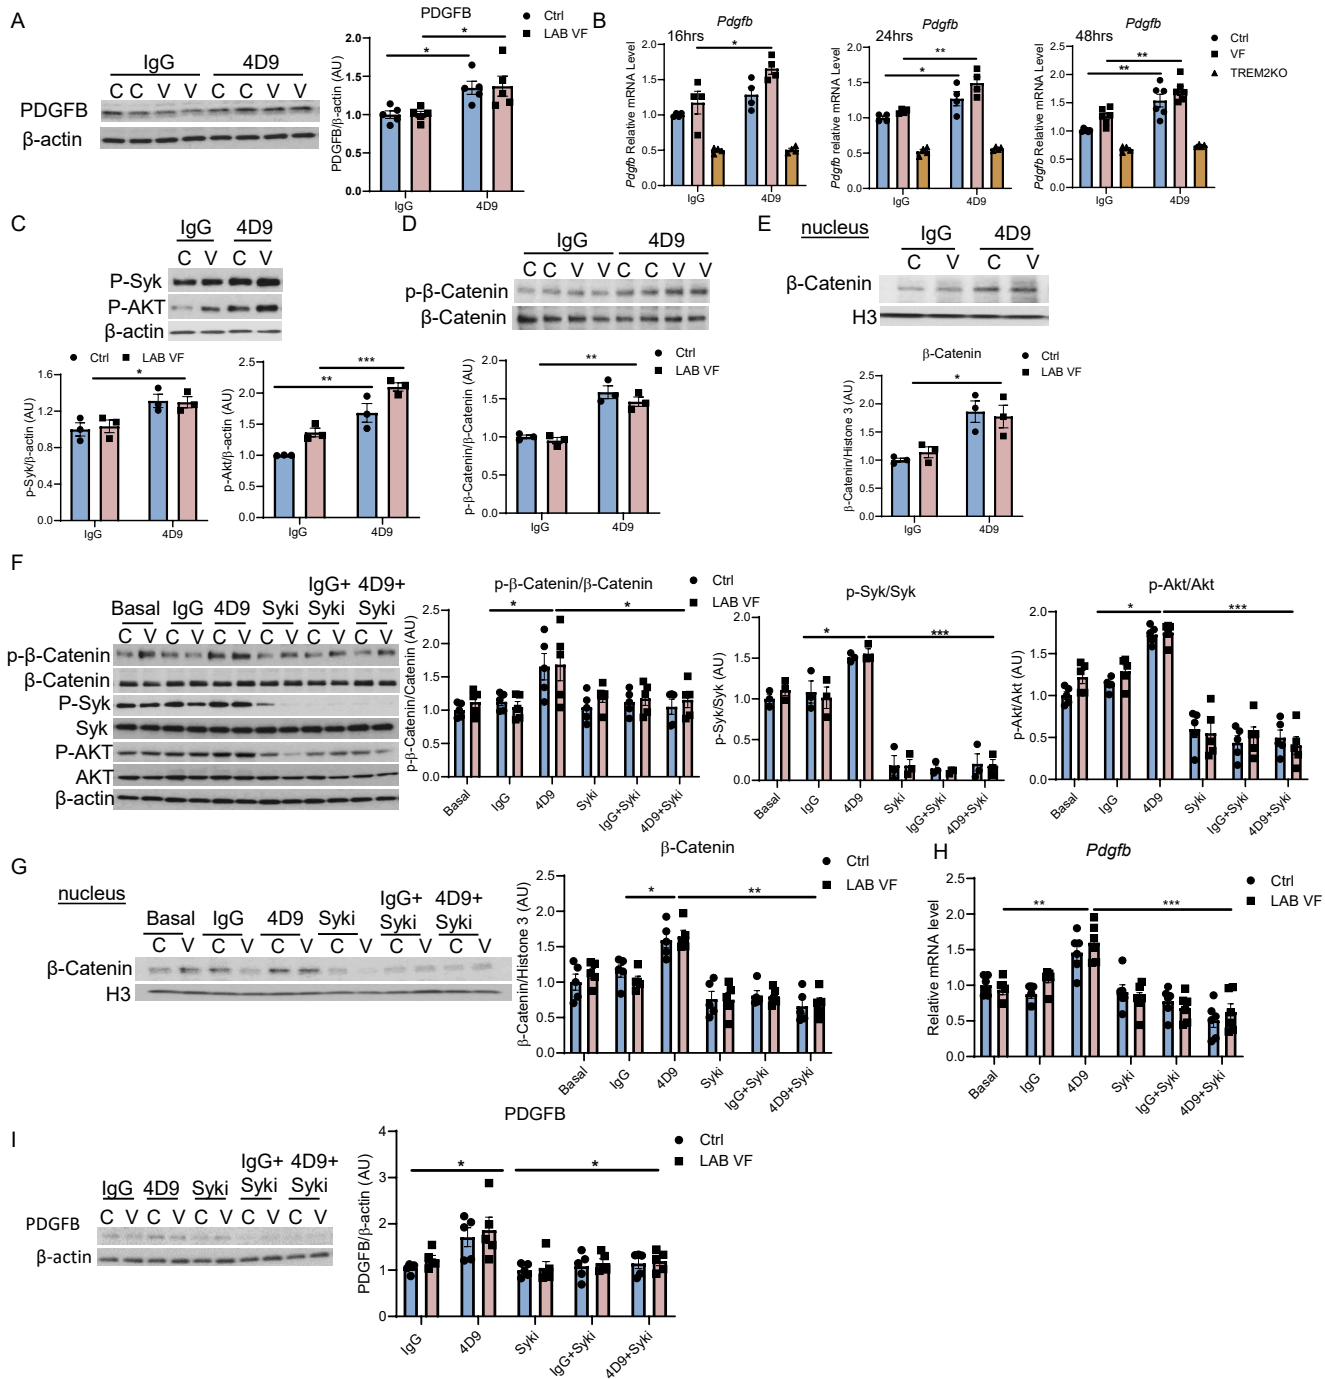

Supplement: jci-135-182939-s022.pdf [file jci-135-182939-s022.pdf]
