# Supplementary material for: Inflammatory crosstalk impairs phagocytic receptors and aggravates atherosclerosis in clonal hematopoiesis in mice
Source: PubMed Central journal article supplement (PMC11684819; doi:10.1172/jci182939), 2024-11-12

# Full unedited blot for Figure 5

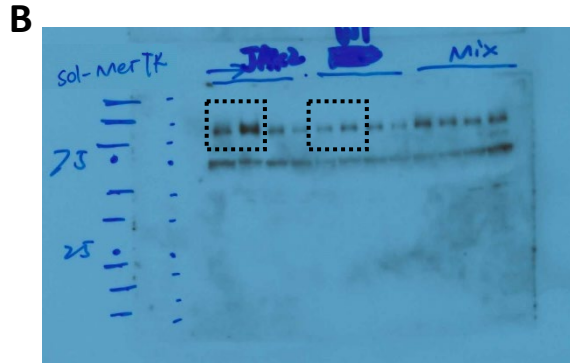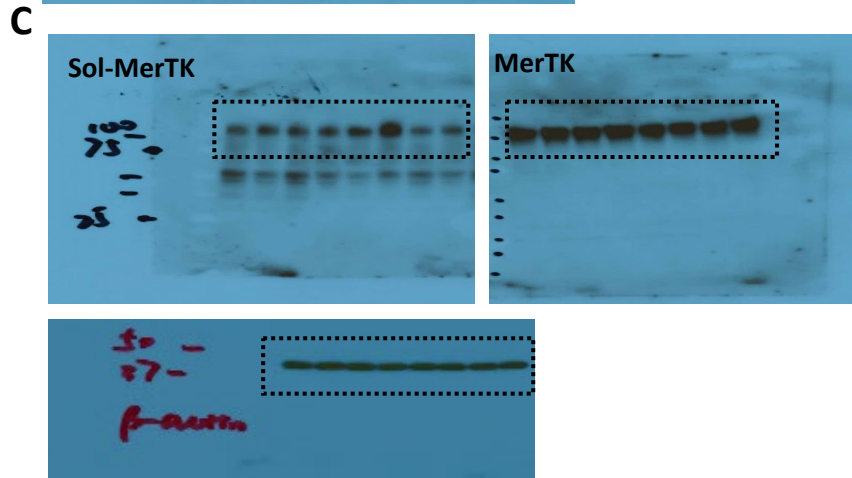

# Full unedited blot for supplemental Figure 2D

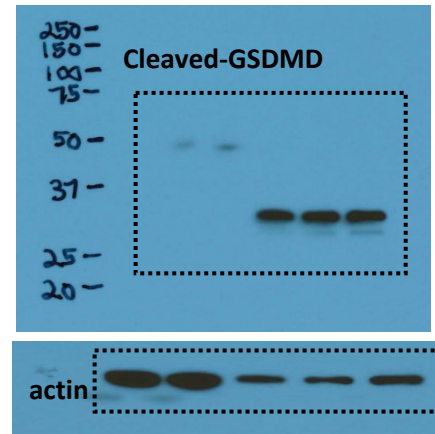

# Full unedited blot for supplemental Figure 3E

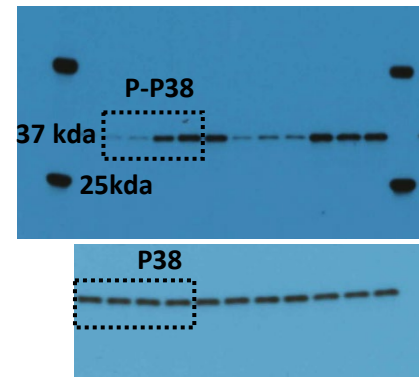

Full unedited blot for supplemental Figure 6

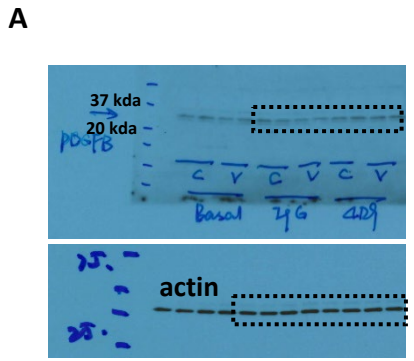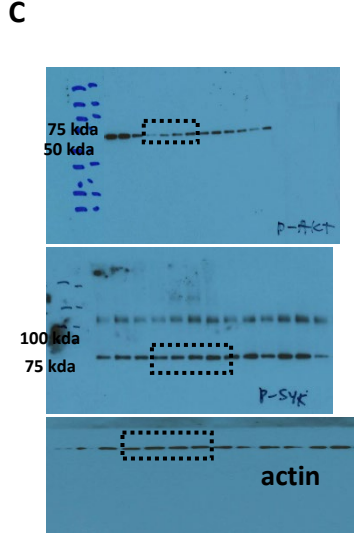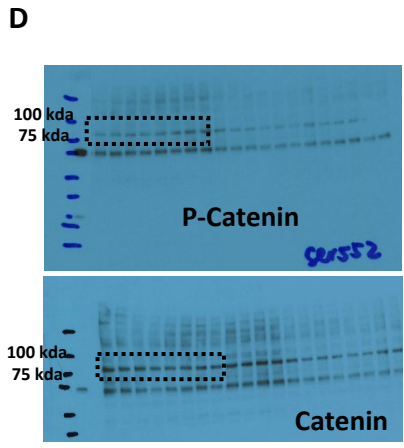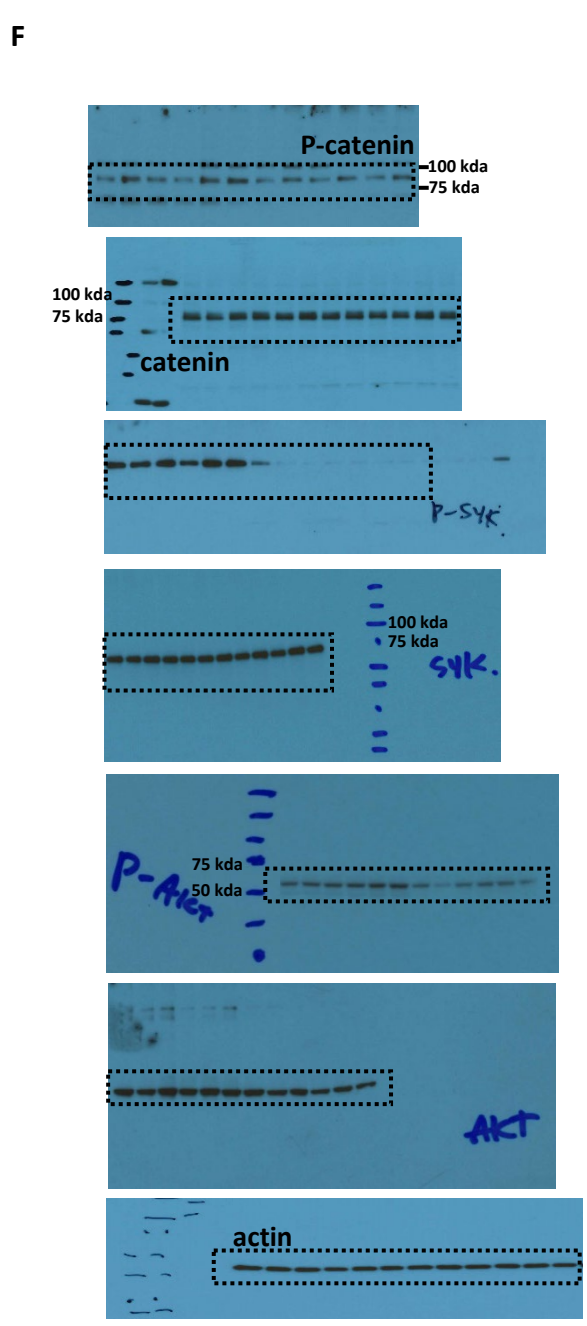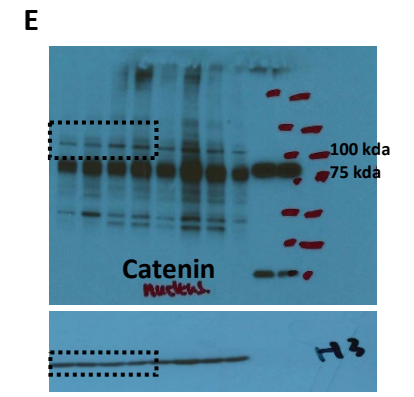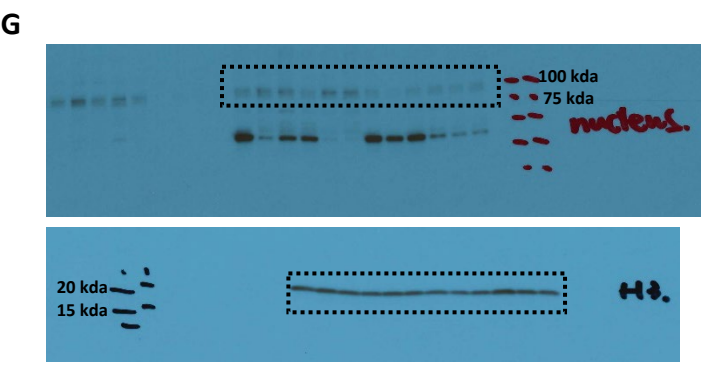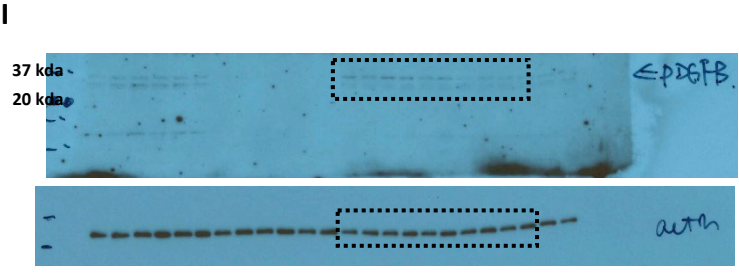

Supplement: jci-135-182939-s023.pdf [file jci-135-182939-s023.pdf]
